# Supplementary material
Source: MDPI journal article supplement (https://www.mdpi.com/search?q=nutrients-10-01101)
Supplement: s001 [file nutrients-10-01101-s001.pdf]

## Table 1. Composition of GrandFusion Supplements

### Blend #1: Fruit and Vegetable Blend (NF-216)

| 6 Essential Vitamins |       | Minimum Premix Claim Per 225.00 mg |  |
|----------------------|-------|------------------------------------|--|
| Nutrient             | % dv  | Label Claim                        |  |
| Vitamin A            | 50.00 | 2,500.000 IU                       |  |
| Vitamin C            | 50.00 | 30.000 mg                          |  |
| Vitamin D            | 50.00 | 200.000 IU                         |  |
| Vitamin E            | 50.00 | 15.000 IU                          |  |
| Vitamin B1           | 50.00 | 0.7500 mg                          |  |
| Vitamin B6           | 50.00 | 1.000 mg                           |  |

Vegetable: Pwd Tomato, Broccoli, Carrot, Shitake Mushrooms

Fruit: Pwd Cranberry, Apple, Orange      Made from 100% organic materials

### Blend #2: Fruit Blend (NF-316)

| 6 Essential Vitamins |       | Minimum Premix Claim Per 225.00 mg |  |
|----------------------|-------|------------------------------------|--|
| Nutrient             | % dv  | Label Claim                        |  |
| Vitamin A            | 50.00 | 2,500.000 IU                       |  |
| Vitamin C            | 50.00 | 30.000 mg                          |  |
| Vitamin D            | 50.00 | 200.000 IU                         |  |
| Vitamin E            | 50.00 | 15.000 IU                          |  |
| Vitamin B1           | 50.00 | 0.7500 mg                          |  |
| Vitamin B6           | 50.00 | 1.000 mg                           |  |

Fruit: Pwd Orange, Cranberry, Apple, Cherry, Blueberry, Strawberry, Shitake Mushrooms  
Made from 100% organic materials
